# Supplementary material for: Genetic Alteration, Prognostic and Immunological Role of Acyl-CoA Synthetase Long-Chain Family Member 4 in a Pan-Cancer Analysis
Source: Front Genet. 2022 Jan 20;13:812674. doi: 10.3389/fgene.2022.812674 (PMC8811308; doi:10.3389/fgene.2022.812674)
Supplement: Supplementary file 2 [file Table3.xlsx]

## Sheet: catalogue
Table S3	cBioPortal-cancer type--Supporting data for Figure 4A
	cBioPortal-mutation--Supporting data for Figure 4B
	cBioPortal-survival--Supporting data for Figure 4C
	GSCA database-SNV--Supporting data for Figure 5A
	GSCA database-CNV--Supporting data for Figure 5C

## Sheet:  cBioPortal -cancer type
Genetic aberration of ACSL4 in tumors using cBioPortal-TCGA pan-cancer panel
Cancer Study	Alteration Frequency	Alteration Type	Alteration Count
Uterine Corpus Endometrial Carcinoma (TCGA, PanCancer Atlas)	0.189036	homdel	1
Uterine Corpus Endometrial Carcinoma (TCGA, PanCancer Atlas)	0.189036	amp	1
Uterine Corpus Endometrial Carcinoma (TCGA, PanCancer Atlas)	6.99433	mutated	37
Skin Cutaneous Melanoma (TCGA, PanCancer Atlas)	0.45045	amp	2
Skin Cutaneous Melanoma (TCGA, PanCancer Atlas)	3.6036	mutated	16
Sarcoma (TCGA, PanCancer Atlas)	0.784314	homdel	2
Sarcoma (TCGA, PanCancer Atlas)	1.17647	amp	3
Sarcoma (TCGA, PanCancer Atlas)	1.56863	mutated	4
Esophageal Adenocarcinoma (TCGA, PanCancer Atlas)	0.549451	homdel	1
Esophageal Adenocarcinoma (TCGA, PanCancer Atlas)	1.0989	amp	2
Esophageal Adenocarcinoma (TCGA, PanCancer Atlas)	0.549451	mutated	1
Cervical Squamous Cell Carcinoma (TCGA, PanCancer Atlas)	2.0202	mutated	6
Head and Neck Squamous Cell Carcinoma (TCGA, PanCancer Atlas)	0.191205	homdel	1
Head and Neck Squamous Cell Carcinoma (TCGA, PanCancer Atlas)	0.573614	amp	3
Head and Neck Squamous Cell Carcinoma (TCGA, PanCancer Atlas)	1.14723	mutated	6
Colorectal Adenocarcinoma (TCGA, PanCancer Atlas)	0.16835	amp	1
Colorectal Adenocarcinoma (TCGA, PanCancer Atlas)	1.6835	mutated	10
Uterine Carcinosarcoma (TCGA, PanCancer Atlas)	1.75439	mutated	1
Brain Lower Grade Glioma (TCGA, PanCancer Atlas)	0.972763	amp	5
Brain Lower Grade Glioma (TCGA, PanCancer Atlas)	0.77821	mutated	4
Pancreatic Adenocarcinoma (TCGA, PanCancer Atlas)	0.543478	amp	1
Pancreatic Adenocarcinoma (TCGA, PanCancer Atlas)	1.08696	mutated	2
Stomach Adenocarcinoma (TCGA, PanCancer Atlas)	0.227273	amp	1
Stomach Adenocarcinoma (TCGA, PanCancer Atlas)	1.36364	mutated	6
Lung Adenocarcinoma (TCGA, PanCancer Atlas)	0.176678	homdel	1
Lung Adenocarcinoma (TCGA, PanCancer Atlas)	1.23675	mutated	7
Kidney Renal Clear Cell Carcinoma (TCGA, PanCancer Atlas)	1.36986	amp	7
Breast Invasive Carcinoma (TCGA, PanCancer Atlas)	0.276753	homdel	3
Breast Invasive Carcinoma (TCGA, PanCancer Atlas)	0.276753	amp	3
Breast Invasive Carcinoma (TCGA, PanCancer Atlas)	0.645756	mutated	7
Ovarian Serous Cystadenocarcinoma (TCGA, PanCancer Atlas)	0.513699	homdel	3
Ovarian Serous Cystadenocarcinoma (TCGA, PanCancer Atlas)	0.513699	amp	3
Ovarian Serous Cystadenocarcinoma (TCGA, PanCancer Atlas)	0.171233	mutated	1
Mesothelioma (TCGA, PanCancer Atlas)	1.14943	mutated	1
Lung Squamous Cell Carcinoma (TCGA, PanCancer Atlas)	0.821355	amp	4
Lung Squamous Cell Carcinoma (TCGA, PanCancer Atlas)	0.205339	mutated	1
Bladder Urothelial Carcinoma (TCGA, PanCancer Atlas)	0.243309	homdel	1
Bladder Urothelial Carcinoma (TCGA, PanCancer Atlas)	0.243309	amp	1
Bladder Urothelial Carcinoma (TCGA, PanCancer Atlas)	0.486618	mutated	2
Liver Hepatocellular Carcinoma (TCGA, PanCancer Atlas)	0.806452	amp	3
Kidney Renal Papillary Cell Carcinoma (TCGA, PanCancer Atlas)	0.353357	amp	1
Kidney Renal Papillary Cell Carcinoma (TCGA, PanCancer Atlas)	0.353357	mutated	1
Testicular Germ Cell Tumors (TCGA, PanCancer Atlas)	0.671141	homdel	1
Glioblastoma Multiforme (TCGA, PanCancer Atlas)	0.506757	mutated	3
Thyroid Carcinoma (TCGA, PanCancer Atlas)	0.2	amp	1

## Sheet: cBioPortal-mutation
					Genetic aberration of ACSL4 in tumors using cBioPortal-TCGA pan-cancer panel
Study of Origin	Sample ID	Cancer Type	Cancer Type Detailed	Protein Change	Annotation	Functional Impact	Mutation Type	Variant Type	Copy #	COSMIC	MS	VS	Center	Chromosome	Start Pos	End Pos	Ref	Var	HGVSg	HGVSc	Allele Freq (T)	Allele Freq (N)	Variant Reads	Ref Reads	Variant Reads (Normal)	Ref Reads (Normal)	# Mut in Sample	Exon	gnomAD	ClinVar	dbSNP	Diagnosis Age	Neoplasm Disease Stage American Joint Committee on Cancer Code	American Joint Committee on Cancer Publication Version Type	Aneuploidy Score	TCGA PanCanAtlas Cancer Type Acronym	Center of sequencing	Last Communication Contact from Initial Pathologic Diagnosis Date	Birth from Initial Pathologic Diagnosis Date	Last Alive Less Initial Pathologic Diagnosis Date Calculated Day Value	Disease Free (Months)	Disease Free Status	Months of disease-specific survival	Disease-specific Survival status	Ethnicity Category	Form completion date	Fraction Genome Altered	Neoplasm Histologic Grade	Neoadjuvant Therapy Type Administered Prior To Resection Text
Uterine Carcinosarcoma (TCGA, PanCancer Atlas)	TCGA-ND-A4WC-01		Uterine Carcinosarcoma/Uterine Malignant Mixed Mullerian Tumor	N111H	OncoKB: NA;CIViC: NA;MyCancerGenome: not present;CancerHotspot: no;3DHotspot: no	MutationAssessor: NA;SIFT: NA;Polyphen-2: NA	Missense_Mutation	SNP	Diploid	1	.	.	.	23	108926385	108926385	T	G	23:g.108926385T>G	ENST00000340800.2:c.331A>C	0.16		10	53		60	3670
Uterine Carcinosarcoma (TCGA, PanCancer Atlas)	TCGA-ND-A4WC-01		Uterine Carcinosarcoma/Uterine Malignant Mixed Mullerian Tumor	E648*	OncoKB: NA;CIViC: NA;MyCancerGenome: not present;CancerHotspot: no;3DHotspot: no	MutationAssessor: NA;SIFT: NA;Polyphen-2: NA	Nonsense_Mutation	SNP	Diploid		.	.	.	23	108902619	108902619	C	A	23:g.108902619C>A	ENST00000340800.2:c.1942G>T	0.26		27	75		108	3670
Brain Lower Grade Glioma (TCGA, PanCancer Atlas)	TCGA-DH-A7UU-01		Astrocytoma	R706*	OncoKB: NA;CIViC: NA;MyCancerGenome: not present;CancerHotspot: no;3DHotspot: no	MutationAssessor: NA;SIFT: NA;Polyphen-2: NA	Nonsense_Mutation	SNP	Diploid		.	.	.	23	108887278	108887278	G	A	23:g.108887278G>A	ENST00000340800.2:c.2116C>T	0.41		28	40		71	42
Brain Lower Grade Glioma (TCGA, PanCancer Atlas)	TCGA-FG-A87N-01		Astrocytoma	Q609K	OncoKB: NA;CIViC: NA;MyCancerGenome: not present;CancerHotspot: no;3DHotspot: no	MutationAssessor: NA;SIFT: NA;Polyphen-2: NA	Missense_Mutation	SNP	Diploid		.	.	.	23	108902736	108902736	G	T	23:g.108902736G>T	ENST00000340800.2:c.1825C>A	0.36		39	68		97	27
Brain Lower Grade Glioma (TCGA, PanCancer Atlas)	TCGA-DU-6392-01		Astrocytoma	G361*	OncoKB: NA;CIViC: NA;MyCancerGenome: not present;CancerHotspot: no;3DHotspot: no	MutationAssessor: NA;SIFT: NA;Polyphen-2: NA	Nonsense_Mutation	SNP	Diploid		.	.	.	23	108917675	108917675	C	A	23:g.108917675C>A	ENST00000340800.2:c.1081G>T	0.09		5	49		44	10869
Brain Lower Grade Glioma (TCGA, PanCancer Atlas)	TCGA-HT-A74K-01		Oligodendroglioma	I462V	OncoKB: NA;CIViC: NA;MyCancerGenome: not present;CancerHotspot: no;3DHotspot: no	MutationAssessor: NA;SIFT: NA;Polyphen-2: NA	Missense_Mutation	SNP	Diploid		.	.	.	23	108911384	108911384	T	C	23:g.108911384T>C	ENST00000340800.2:c.1384A>G	0.04		5	110		145	29
Ovarian Serous Cystadenocarcinoma (TCGA, PanCancer Atlas)	TCGA-20-1686-01		Serous Ovarian Cancer	P418L	OncoKB: NA;CIViC: NA;MyCancerGenome: not present;CancerHotspot: no;3DHotspot: no	MutationAssessor: NA;SIFT: NA;Polyphen-2: NA	Missense_Mutation	SNP	Gain	1	.	.	.	23	108912275	108912275	G	A	23:g.108912275G>A	ENST00000340800.2:c.1253C>T	0.19		16	70		264	94
Glioblastoma Multiforme (TCGA, PanCancer Atlas)	TCGA-76-6283-01		Glioblastoma Multiforme	S249*	OncoKB: NA;CIViC: NA;MyCancerGenome: not present;CancerHotspot: no;3DHotspot: no	MutationAssessor: NA;SIFT: NA;Polyphen-2: NA	Nonsense_Mutation	SNP	Diploid		.	.	.	23	108924259	108924259	G	T	23:g.108924259G>T	ENST00000340800.2:c.746C>A	0.33		38	77		155	87
Glioblastoma Multiforme (TCGA, PanCancer Atlas)	TCGA-06-5416-01		Glioblastoma Multiforme	R452Q	OncoKB: NA;CIViC: NA;MyCancerGenome: not present;CancerHotspot: no;3DHotspot: no	MutationAssessor: NA;SIFT: NA;Polyphen-2: NA	Missense_Mutation	SNP	ShallowDel		.	.	.	23	108911413	108911413	C	T	23:g.108911413C>T	ENST00000340800.2:c.1355G>A	0.57		148	112		268	12192
Glioblastoma Multiforme (TCGA, PanCancer Atlas)	TCGA-06-5416-01		Glioblastoma Multiforme	I11F	OncoKB: NA;CIViC: NA;MyCancerGenome: not present;CancerHotspot: no;3DHotspot: no	MutationAssessor: NA;SIFT: NA;Polyphen-2: NA	Missense_Mutation	SNP	ShallowDel		.	.	.	23	108926685	108926685	T	A	23:g.108926685T>A	ENST00000340800.2:c.31A>T	0.24		66	211		231	12192
Glioblastoma Multiforme (TCGA, PanCancer Atlas)	TCGA-19-5956-01		Glioblastoma Multiforme	V671I	OncoKB: NA;CIViC: NA;MyCancerGenome: not present;CancerHotspot: no;3DHotspot: no	MutationAssessor: NA;SIFT: NA;Polyphen-2: NA	Missense_Mutation	SNP	ShallowDel		.	.	.	23	108887383	108887383	C	T	23:g.108887383C>T	ENST00000340800.2:c.2011G>A	0.41		17	24		105	6912
Sarcoma (TCGA, PanCancer Atlas)	TCGA-FX-A8OO-01		Synovial Sarcoma	R570C	OncoKB: NA;CIViC: NA;MyCancerGenome: not present;CancerHotspot: no;3DHotspot: no	MutationAssessor: NA;SIFT: NA;Polyphen-2: NA	Missense_Mutation	SNP	Diploid		.	.	.	23	108904872	108904872	G	A	23:g.108904872G>A	ENST00000340800.2:c.1708C>T	0.46		24	28		38	30
Sarcoma (TCGA, PanCancer Atlas)	TCGA-WK-A8XT-01		Synovial Sarcoma	K670N	OncoKB: NA;CIViC: NA;MyCancerGenome: not present;CancerHotspot: no;3DHotspot: no	MutationAssessor: NA;SIFT: NA;Polyphen-2: NA	Missense_Mutation	SNP	Diploid		.	.	.	23	108887384	108887384	C	G	23:g.108887384C>G	ENST00000340800.2:c.2010G>C	0.5		54	54		94	46
Sarcoma (TCGA, PanCancer Atlas)	TCGA-DX-A3UE-01		Leiomyosarcoma	A538P	OncoKB: NA;CIViC: NA;MyCancerGenome: not present;CancerHotspot: no;3DHotspot: no	MutationAssessor: NA;SIFT: NA;Polyphen-2: NA	Missense_Mutation	SNP	ShallowDel		.	.	.	23	108906533	108906533	C	G	23:g.108906533C>G	ENST00000340800.2:c.1612G>C	0.08		3	35		18	53
Sarcoma (TCGA, PanCancer Atlas)	TCGA-K1-A3PN-01		Leiomyosarcoma	M272K	OncoKB: NA;CIViC: NA;MyCancerGenome: not present;CancerHotspot: no;3DHotspot: no	MutationAssessor: NA;SIFT: NA;Polyphen-2: NA	Missense_Mutation	SNP	ShallowDel		.	.	.	23	108921608	108921608	A	T	23:g.108921608A>T	ENST00000340800.2:c.815T>A	0.2		12	47		41	35
Lung Squamous Cell Carcinoma (TCGA, PanCancer Atlas)	TCGA-22-4601-01		Lung Squamous Cell Carcinoma	L321F	OncoKB: NA;CIViC: NA;MyCancerGenome: not present;CancerHotspot: no;3DHotspot: no	MutationAssessor: NA;SIFT: NA;Polyphen-2: NA	Missense_Mutation	SNP	Diploid	1	.	.	.	23	108921307	108921307	C	A	23:g.108921307C>A	ENST00000340800.2:c.963G>T	0.3	0.0085	38	89	1	116	164
Bladder Urothelial Carcinoma (TCGA, PanCancer Atlas)	TCGA-KQ-A41R-01		Bladder Urothelial Carcinoma	G317D	OncoKB: NA;CIViC: NA;MyCancerGenome: not present;CancerHotspot: no;3DHotspot: no	MutationAssessor: NA;SIFT: NA;Polyphen-2: NA	Missense_Mutation	SNP	Diploid		.	.	.	23	108921320	108921320	C	T	23:g.108921320C>T	ENST00000340800.2:c.950G>A	0.24		28	87		102	683
Bladder Urothelial Carcinoma (TCGA, PanCancer Atlas)	TCGA-MV-A51V-01		Bladder Urothelial Carcinoma	E535Q	OncoKB: NA;CIViC: NA;MyCancerGenome: not present;CancerHotspot: no;3DHotspot: no	MutationAssessor: NA;SIFT: NA;Polyphen-2: NA	Missense_Mutation	SNP	ShallowDel		.	.	.	23	108906542	108906542	C	G	23:g.108906542C>G	ENST00000340800.2:c.1603G>C	0.09		11	117		76	1421
Uterine Corpus Endometrial Carcinoma (TCGA, PanCancer Atlas)	TCGA-E6-A1LX-01		Uterine Endometrioid Carcinoma	N111H	OncoKB: NA;CIViC: NA;MyCancerGenome: not present;CancerHotspot: no;3DHotspot: no	MutationAssessor: NA;SIFT: NA;Polyphen-2: NA	Missense_Mutation	SNP	Diploid	1	.	.	.	23	108926385	108926385	T	G	23:g.108926385T>G	ENST00000340800.2:c.331A>C	0.23		9	30		28	12704
Uterine Corpus Endometrial Carcinoma (TCGA, PanCancer Atlas)	TCGA-A5-A0G2-01		Uterine Serous Carcinoma/Uterine Papillary Serous Carcinoma	R133H	OncoKB: NA;CIViC: NA;MyCancerGenome: not present;CancerHotspot: no;3DHotspot: no	MutationAssessor: NA;SIFT: NA;Polyphen-2: NA	Missense_Mutation	SNP	Diploid	4	.	.	.	23	108926079	108926079	C	T	23:g.108926079C>T	ENST00000340800.2:c.398G>A	0.73		95	35		266	25741
Uterine Corpus Endometrial Carcinoma (TCGA, PanCancer Atlas)	TCGA-A5-A2K5-01		Uterine Endometrioid Carcinoma	L120I	OncoKB: NA;CIViC: NA;MyCancerGenome: not present;CancerHotspot: no;3DHotspot: no	MutationAssessor: NA;SIFT: NA;Polyphen-2: NA	Missense_Mutation	SNP	Diploid	1	.	.	.	23	108926119	108926119	G	T	23:g.108926119G>T	ENST00000340800.2:c.358C>A	0.43		9	12		29	8514
Uterine Corpus Endometrial Carcinoma (TCGA, PanCancer Atlas)	TCGA-AX-A0J0-01		Uterine Endometrioid Carcinoma	L120I	OncoKB: NA;CIViC: NA;MyCancerGenome: not present;CancerHotspot: no;3DHotspot: no	MutationAssessor: NA;SIFT: NA;Polyphen-2: NA	Missense_Mutation	SNP	Diploid	1	.	.	.	23	108926119	108926119	G	T	23:g.108926119G>T	ENST00000340800.2:c.358C>A	0.37		16	27		108	7801
Uterine Corpus Endometrial Carcinoma (TCGA, PanCancer Atlas)	TCGA-AJ-A3OK-01		Uterine Serous Carcinoma/Uterine Papillary Serous Carcinoma	P345L	OncoKB: NA;CIViC: NA;MyCancerGenome: not present;CancerHotspot: no;3DHotspot: no	MutationAssessor: NA;SIFT: NA;Polyphen-2: NA	Missense_Mutation	SNP	Diploid		.	.	.	23	108921236	108921236	G	A	23:g.108921236G>A	ENST00000340800.2:c.1034C>T	0.06		5	78		83	657
Uterine Corpus Endometrial Carcinoma (TCGA, PanCancer Atlas)	TCGA-AP-A052-01		Uterine Serous Carcinoma/Uterine Papillary Serous Carcinoma	X422_splice	OncoKB: NA;CIViC: NA;MyCancerGenome: not present;CancerHotspot: no;3DHotspot: no	MutationAssessor: NA;SIFT: NA;Polyphen-2: NA	Splice_Site	SNP	ShallowDel		.	.	.	23	108911504	108911504	T	G	23:g.108911504T>G	ENST00000340800.2:c.1266-2A>C	0.35	0.0043	77	141	1	232	42
Uterine Corpus Endometrial Carcinoma (TCGA, PanCancer Atlas)	TCGA-AP-A056-01		Uterine Endometrioid Carcinoma	V520I	OncoKB: NA;CIViC: NA;MyCancerGenome: not present;CancerHotspot: no;3DHotspot: no	MutationAssessor: NA;SIFT: NA;Polyphen-2: NA	Missense_Mutation	SNP	Diploid	2	.	.	.	23	108906587	108906587	C	T	23:g.108906587C>T	ENST00000340800.2:c.1558G>A	0.29		147	354		691	8236
Uterine Corpus Endometrial Carcinoma (TCGA, PanCancer Atlas)	TCGA-AP-A056-01		Uterine Endometrioid Carcinoma	S249A	OncoKB: NA;CIViC: NA;MyCancerGenome: not present;CancerHotspot: no;3DHotspot: no	MutationAssessor: NA;SIFT: NA;Polyphen-2: NA	Missense_Mutation	SNP	Diploid	2	.	.	.	23	108924260	108924260	A	C	23:g.108924260A>C	ENST00000340800.2:c.745T>G	0.25		63	187		319	8236
Uterine Corpus Endometrial Carcinoma (TCGA, PanCancer Atlas)	TCGA-AP-A059-01		Uterine Endometrioid Carcinoma	R706Q	OncoKB: NA;CIViC: NA;MyCancerGenome: not present;CancerHotspot: no;3DHotspot: no	MutationAssessor: NA;SIFT: NA;Polyphen-2: NA	Missense_Mutation	SNP		1	.	.	.	23	108887277	108887277	C	T	23:g.108887277C>T	ENST00000340800.2:c.2117G>A	0.21		123	464		535
Uterine Corpus Endometrial Carcinoma (TCGA, PanCancer Atlas)	TCGA-AP-A059-01		Uterine Endometrioid Carcinoma	M276I	OncoKB: NA;CIViC: NA;MyCancerGenome: not present;CancerHotspot: no;3DHotspot: no	MutationAssessor: NA;SIFT: NA;Polyphen-2: NA	Missense_Mutation	SNP		1	.	.	.	23	108921595	108921595	C	T	23:g.108921595C>T	ENST00000340800.2:c.828G>A	0.2		43	168		266
Uterine Corpus Endometrial Carcinoma (TCGA, PanCancer Atlas)	TCGA-AP-A0LM-01		Uterine Endometrioid Carcinoma	E187K	OncoKB: NA;CIViC: NA;MyCancerGenome: not present;CancerHotspot: no;3DHotspot: no	MutationAssessor: NA;SIFT: NA;Polyphen-2: NA	Missense_Mutation	SNP		1	.	.	.	23	108924575	108924575	C	T	23:g.108924575C>T	ENST00000340800.2:c.559G>A	0.2		42	166		377
Uterine Corpus Endometrial Carcinoma (TCGA, PanCancer Atlas)	TCGA-AP-A1E0-01		Uterine Endometrioid Carcinoma	G241E	OncoKB: NA;CIViC: NA;MyCancerGenome: not present;CancerHotspot: no;3DHotspot: no	MutationAssessor: NA;SIFT: NA;Polyphen-2: NA	Missense_Mutation	SNP			.	.	.	23	108924283	108924283	C	T	23:g.108924283C>T	ENST00000340800.2:c.722G>A	0.13		5	34		50
Uterine Corpus Endometrial Carcinoma (TCGA, PanCancer Atlas)	TCGA-AX-A05Z-01		Uterine Endometrioid Carcinoma	R305I	OncoKB: NA;CIViC: NA;MyCancerGenome: not present;CancerHotspot: no;3DHotspot: no	MutationAssessor: NA;SIFT: NA;Polyphen-2: NA	Missense_Mutation	SNP		2	.	.	.	23	108921509	108921509	C	A	23:g.108921509C>A	ENST00000340800.2:c.914G>T	0.07		13	177		343
Uterine Corpus Endometrial Carcinoma (TCGA, PanCancer Atlas)	TCGA-B5-A0JY-01		Uterine Endometrioid Carcinoma	R305I	OncoKB: NA;CIViC: NA;MyCancerGenome: not present;CancerHotspot: no;3DHotspot: no	MutationAssessor: NA;SIFT: NA;Polyphen-2: NA	Missense_Mutation	SNP		2	.	.	.	23	108921509	108921509	C	A	23:g.108921509C>A	ENST00000340800.2:c.914G>T	0.32		60	129		144
Uterine Corpus Endometrial Carcinoma (TCGA, PanCancer Atlas)	TCGA-B5-A11E-01		Uterine Endometrioid Carcinoma	R305I	OncoKB: NA;CIViC: NA;MyCancerGenome: not present;CancerHotspot: no;3DHotspot: no	MutationAssessor: NA;SIFT: NA;Polyphen-2: NA	Missense_Mutation	SNP		2	.	.	.	23	108921509	108921509	C	A	23:g.108921509C>A	ENST00000340800.2:c.914G>T	0.41		24	35		114
Uterine Corpus Endometrial Carcinoma (TCGA, PanCancer Atlas)	TCGA-AX-A06F-01		Uterine Endometrioid Carcinoma	D66N	OncoKB: NA;CIViC: NA;MyCancerGenome: not present;CancerHotspot: no;3DHotspot: no	MutationAssessor: NA;SIFT: NA;Polyphen-2: NA	Missense_Mutation	SNP		1	.	.	.	23	108926520	108926520	C	T	23:g.108926520C>T	ENST00000340800.2:c.196G>A	0.4		191	285		439
Uterine Corpus Endometrial Carcinoma (TCGA, PanCancer Atlas)	TCGA-B5-A11E-01		Uterine Endometrioid Carcinoma	D66N	OncoKB: NA;CIViC: NA;MyCancerGenome: not present;CancerHotspot: no;3DHotspot: no	MutationAssessor: NA;SIFT: NA;Polyphen-2: NA	Missense_Mutation	SNP		1	.	.	.	23	108926520	108926520	C	T	23:g.108926520C>T	ENST00000340800.2:c.196G>A	0.46		73	85		420
Uterine Corpus Endometrial Carcinoma (TCGA, PanCancer Atlas)	TCGA-E6-A1LX-01		Uterine Endometrioid Carcinoma	D66N	OncoKB: NA;CIViC: NA;MyCancerGenome: not present;CancerHotspot: no;3DHotspot: no	MutationAssessor: NA;SIFT: NA;Polyphen-2: NA	Missense_Mutation	SNP	Diploid	1	.	.	.	23	108926520	108926520	C	T	23:g.108926520C>T	ENST00000340800.2:c.196G>A	0.19		13	54		52	12704
Uterine Corpus Endometrial Carcinoma (TCGA, PanCancer Atlas)	TCGA-AX-A0J1-01		Uterine Endometrioid Carcinoma	A474D	OncoKB: NA;CIViC: NA;MyCancerGenome: not present;CancerHotspot: no;3DHotspot: no	MutationAssessor: NA;SIFT: NA;Polyphen-2: NA	Missense_Mutation	SNP		1	.	.	.	23	108911347	108911347	G	T	23:g.108911347G>T	ENST00000340800.2:c.1421C>A	0.17		56	283		209
Uterine Corpus Endometrial Carcinoma (TCGA, PanCancer Atlas)	TCGA-B5-A11N-01		Uterine Endometrioid Carcinoma	N106H	OncoKB: NA;CIViC: NA;MyCancerGenome: not present;CancerHotspot: no;3DHotspot: no	MutationAssessor: NA;SIFT: NA;Polyphen-2: NA	Missense_Mutation	SNP		1	.	.	.	23	108926400	108926400	T	G	23:g.108926400T>G	ENST00000340800.2:c.316A>C	0.32		127	275		446
Uterine Corpus Endometrial Carcinoma (TCGA, PanCancer Atlas)	TCGA-BS-A0UF-01		Uterine Endometrioid Carcinoma	X177_splice	OncoKB: NA;CIViC: NA;MyCancerGenome: not present;CancerHotspot: no;3DHotspot: no	MutationAssessor: NA;SIFT: NA;Polyphen-2: NA	Splice_Site	SNP			.	.	.	23	108924605	108924605	C	T	23:g.108924605C>T	ENST00000340800.2:c.530-1G>A	0.3		29	67		136
Uterine Corpus Endometrial Carcinoma (TCGA, PanCancer Atlas)	TCGA-BS-A0UV-01		Uterine Endometrioid Carcinoma	S607I	OncoKB: NA;CIViC: NA;MyCancerGenome: not present;CancerHotspot: no;3DHotspot: no	MutationAssessor: NA;SIFT: NA;Polyphen-2: NA	Missense_Mutation	SNP		1	.	.	.	23	108904760	108904760	C	A	23:g.108904760C>A	ENST00000340800.2:c.1820G>T	0.13		26	172		350
Uterine Corpus Endometrial Carcinoma (TCGA, PanCancer Atlas)	TCGA-BS-A0UV-01		Uterine Endometrioid Carcinoma	N234T	OncoKB: NA;CIViC: NA;MyCancerGenome: not present;CancerHotspot: no;3DHotspot: no	MutationAssessor: NA;SIFT: NA;Polyphen-2: NA	Missense_Mutation	SNP		1	.	.	.	23	108924304	108924304	T	G	23:g.108924304T>G	ENST00000340800.2:c.701A>C	0.38		81	135		438
Uterine Corpus Endometrial Carcinoma (TCGA, PanCancer Atlas)	TCGA-BS-A0UV-01		Uterine Endometrioid Carcinoma	K113R	OncoKB: NA;CIViC: NA;MyCancerGenome: not present;CancerHotspot: no;3DHotspot: no	MutationAssessor: NA;SIFT: NA;Polyphen-2: NA	Missense_Mutation	SNP		1	.	.	.	23	108926378	108926378	T	C	23:g.108926378T>C	ENST00000340800.2:c.338A>G	0.38		75	125		339
Uterine Corpus Endometrial Carcinoma (TCGA, PanCancer Atlas)	TCGA-D1-A160-01		Uterine Endometrioid Carcinoma	V488A	OncoKB: NA;CIViC: NA;MyCancerGenome: not present;CancerHotspot: no;3DHotspot: no	MutationAssessor: NA;SIFT: NA;Polyphen-2: NA	Missense_Mutation	SNP		1	.	.	.	23	108908699	108908699	A	G	23:g.108908699A>G	ENST00000340800.2:c.1463T>C	0.38		180	300		376
Uterine Corpus Endometrial Carcinoma (TCGA, PanCancer Atlas)	TCGA-D1-A16X-01		Uterine Endometrioid Carcinoma	A232V	OncoKB: NA;CIViC: NA;MyCancerGenome: not present;CancerHotspot: no;3DHotspot: no	MutationAssessor: NA;SIFT: NA;Polyphen-2: NA	Missense_Mutation	SNP		1	.	.	.	23	108924310	108924310	G	A	23:g.108924310G>A	ENST00000340800.2:c.695C>T	0.23		74	254		357
Uterine Corpus Endometrial Carcinoma (TCGA, PanCancer Atlas)	TCGA-D1-A17Q-01		Uterine Endometrioid Carcinoma	X607_splice	OncoKB: NA;CIViC: NA;MyCancerGenome: not present;CancerHotspot: no;3DHotspot: no	MutationAssessor: NA;SIFT: NA;Polyphen-2: NA	Splice_Site	SNP			.	.	.	23	108902742	108902742	T	G	23:g.108902742T>G	ENST00000340800.2:c.1821-2A>C	0.44		115	149		217
Uterine Corpus Endometrial Carcinoma (TCGA, PanCancer Atlas)	TCGA-D1-A17Q-01		Uterine Endometrioid Carcinoma	K81T	OncoKB: NA;CIViC: NA;MyCancerGenome: not present;CancerHotspot: no;3DHotspot: no	MutationAssessor: NA;SIFT: NA;Polyphen-2: NA	Missense_Mutation	SNP		1	.	.	.	23	108926474	108926474	T	G	23:g.108926474T>G	ENST00000340800.2:c.242A>C	0.43		201	263		354
Uterine Corpus Endometrial Carcinoma (TCGA, PanCancer Atlas)	TCGA-E6-A2P9-01		Uterine Endometrioid Carcinoma	D94G	OncoKB: NA;CIViC: NA;MyCancerGenome: not present;CancerHotspot: no;3DHotspot: no	MutationAssessor: NA;SIFT: NA;Polyphen-2: NA	Missense_Mutation	SNP		1	.	.	.	23	108926435	108926435	T	C	23:g.108926435T>C	ENST00000340800.2:c.281A>G	0.38		21	34		31
Uterine Corpus Endometrial Carcinoma (TCGA, PanCancer Atlas)	TCGA-A5-A0G1-01		Uterine Serous Carcinoma/Uterine Papillary Serous Carcinoma	A659T	OncoKB: NA;CIViC: NA;MyCancerGenome: not present;CancerHotspot: no;3DHotspot: no	MutationAssessor: NA;SIFT: NA;Polyphen-2: NA	Missense_Mutation	SNP			.	.	.	23	108902586	108902586	C	T	23:g.108902586C>T	ENST00000340800.2:c.1975G>A	0.16		57	295		312
Uterine Corpus Endometrial Carcinoma (TCGA, PanCancer Atlas)	TCGA-A5-A0G2-01		Uterine Serous Carcinoma/Uterine Papillary Serous Carcinoma	G308R	OncoKB: NA;CIViC: NA;MyCancerGenome: not present;CancerHotspot: no;3DHotspot: no	MutationAssessor: NA;SIFT: NA;Polyphen-2: NA	Missense_Mutation	SNP	Diploid		.	.	.	23	108921501	108921501	C	T	23:g.108921501C>T	ENST00000340800.2:c.922G>A	0.72		100	39		287	25741
Uterine Corpus Endometrial Carcinoma (TCGA, PanCancer Atlas)	TCGA-A5-A0G2-01		Uterine Serous Carcinoma/Uterine Papillary Serous Carcinoma	G146V	OncoKB: NA;CIViC: NA;MyCancerGenome: not present;CancerHotspot: no;3DHotspot: no	MutationAssessor: NA;SIFT: NA;Polyphen-2: NA	Missense_Mutation	SNP	Diploid		.	.	.	23	108926040	108926040	C	A	23:g.108926040C>A	ENST00000340800.2:c.437G>T	0.39		52	80		290	25741
Uterine Corpus Endometrial Carcinoma (TCGA, PanCancer Atlas)	TCGA-A5-A2K5-01		Uterine Endometrioid Carcinoma	L260F	OncoKB: NA;CIViC: NA;MyCancerGenome: not present;CancerHotspot: no;3DHotspot: no	MutationAssessor: NA;SIFT: NA;Polyphen-2: NA	Missense_Mutation	SNP	Diploid		.	.	.	23	108921643	108921643	C	A	23:g.108921643C>A	ENST00000340800.2:c.780G>T	0.5		21	21		45	8514
Uterine Corpus Endometrial Carcinoma (TCGA, PanCancer Atlas)	TCGA-AJ-A3EK-01		Uterine Endometrioid Carcinoma	K312M	OncoKB: NA;CIViC: NA;MyCancerGenome: not present;CancerHotspot: no;3DHotspot: no	MutationAssessor: NA;SIFT: NA;Polyphen-2: NA	Missense_Mutation	SNP			.	.	.	23	108921335	108921335	T	A	23:g.108921335T>A	ENST00000340800.2:c.935A>T	0.08		9	97		67
Uterine Corpus Endometrial Carcinoma (TCGA, PanCancer Atlas)	TCGA-AP-A1DR-01		Uterine Endometrioid Carcinoma	X569_splice	OncoKB: NA;CIViC: NA;MyCancerGenome: not present;CancerHotspot: no;3DHotspot: no	MutationAssessor: NA;SIFT: NA;Polyphen-2: NA	Splice_Region	SNP			.	.	.	23	108906437	108906437	G	A	23:g.108906437G>A	ENST00000340800.2:c.1705+3C>T	0.48		16	17		31
Uterine Corpus Endometrial Carcinoma (TCGA, PanCancer Atlas)	TCGA-AP-A1DV-01		Uterine Endometrioid Carcinoma	S584Y	OncoKB: NA;CIViC: NA;MyCancerGenome: not present;CancerHotspot: no;3DHotspot: no	MutationAssessor: NA;SIFT: NA;Polyphen-2: NA	Missense_Mutation	SNP			.	.	.	23	108904829	108904829	G	T	23:g.108904829G>T	ENST00000340800.2:c.1751C>A	0.32		11	23		22
Uterine Corpus Endometrial Carcinoma (TCGA, PanCancer Atlas)	TCGA-AP-A1E1-01		Uterine Endometrioid Carcinoma	G414R	OncoKB: NA;CIViC: NA;MyCancerGenome: not present;CancerHotspot: no;3DHotspot: no	MutationAssessor: NA;SIFT: NA;Polyphen-2: NA	Missense_Mutation	SNP			.	.	.	23	108912288	108912288	C	T	23:g.108912288C>T	ENST00000340800.2:c.1240G>A	0.17		4	19		32
Uterine Corpus Endometrial Carcinoma (TCGA, PanCancer Atlas)	TCGA-AX-A05Z-01		Uterine Endometrioid Carcinoma	E504*	OncoKB: NA;CIViC: NA;MyCancerGenome: not present;CancerHotspot: no;3DHotspot: no	MutationAssessor: NA;SIFT: NA;Polyphen-2: NA	Nonsense_Mutation	SNP			.	.	.	23	108908652	108908652	C	A	23:g.108908652C>A	ENST00000340800.2:c.1510G>T	0.09		19	182		346
Uterine Corpus Endometrial Carcinoma (TCGA, PanCancer Atlas)	TCGA-AX-A05Z-01		Uterine Endometrioid Carcinoma	K47N	OncoKB: NA;CIViC: NA;MyCancerGenome: not present;CancerHotspot: no;3DHotspot: no	MutationAssessor: NA;SIFT: NA;Polyphen-2: NA	Missense_Mutation	SNP			.	.	.	23	108926575	108926575	T	G	23:g.108926575T>G	ENST00000340800.2:c.141A>C	0.06		22	344		479
Uterine Corpus Endometrial Carcinoma (TCGA, PanCancer Atlas)	TCGA-AX-A0J0-01		Uterine Endometrioid Carcinoma	X60_splice	OncoKB: NA;CIViC: NA;MyCancerGenome: not present;CancerHotspot: no;3DHotspot: no	MutationAssessor: NA;SIFT: NA;Polyphen-2: NA	Splice_Region	SNP	Diploid		.	.	.	23	108926893	108926893	C	T	23:g.108926893C>T	ENST00000340800.2:c.-178G>A	0.5		4	4		25	7801
Uterine Corpus Endometrial Carcinoma (TCGA, PanCancer Atlas)	TCGA-AX-A2HD-01		Uterine Endometrioid Carcinoma	X60_splice	OncoKB: NA;CIViC: NA;MyCancerGenome: not present;CancerHotspot: no;3DHotspot: no	MutationAssessor: NA;SIFT: NA;Polyphen-2: NA	Splice_Region	SNP	Diploid		.	.	.	23	108926893	108926893	C	T	23:g.108926893C>T	ENST00000340800.2:c.-178G>A	0.38		5	8		14	7858
Uterine Corpus Endometrial Carcinoma (TCGA, PanCancer Atlas)	TCGA-B5-A3FC-01		Uterine Endometrioid Carcinoma	X60_splice	OncoKB: NA;CIViC: NA;MyCancerGenome: not present;CancerHotspot: no;3DHotspot: no	MutationAssessor: NA;SIFT: NA;Polyphen-2: NA	Splice_Region	SNP	Diploid		.	.	.	23	108926893	108926893	C	T	23:g.108926893C>T	ENST00000340800.2:c.-178G>A	0.36		4	7		20	12220
Uterine Corpus Endometrial Carcinoma (TCGA, PanCancer Atlas)	TCGA-AX-A2HC-01		Uterine Endometrioid Carcinoma	K312N	OncoKB: NA;CIViC: NA;MyCancerGenome: not present;CancerHotspot: no;3DHotspot: no	MutationAssessor: NA;SIFT: NA;Polyphen-2: NA	Missense_Mutation	SNP			.	.	.	23	108921334	108921334	C	A	23:g.108921334C>A	ENST00000340800.2:c.936G>T	0.39		22	34		60
Uterine Corpus Endometrial Carcinoma (TCGA, PanCancer Atlas)	TCGA-AX-A2HC-01		Uterine Endometrioid Carcinoma	X310_splice	OncoKB: NA;CIViC: NA;MyCancerGenome: not present;CancerHotspot: no;3DHotspot: no	MutationAssessor: NA;SIFT: NA;Polyphen-2: NA	Splice_Site	SNP			.	.	.	23	108921341	108921341	C	A	23:g.108921341C>A	ENST00000340800.2:c.930-1G>T	0.55		30	25		60
Uterine Corpus Endometrial Carcinoma (TCGA, PanCancer Atlas)	TCGA-B5-A0JY-01		Uterine Endometrioid Carcinoma	F665C	OncoKB: NA;CIViC: NA;MyCancerGenome: not present;CancerHotspot: no;3DHotspot: no	MutationAssessor: NA;SIFT: NA;Polyphen-2: NA	Missense_Mutation	SNP			.	.	.	23	108887400	108887400	A	C	23:g.108887400A>C	ENST00000340800.2:c.1994T>G	0.27		86	232		213
Uterine Corpus Endometrial Carcinoma (TCGA, PanCancer Atlas)	TCGA-B5-A3FC-01		Uterine Endometrioid Carcinoma	I704T	OncoKB: NA;CIViC: NA;MyCancerGenome: not present;CancerHotspot: no;3DHotspot: no	MutationAssessor: NA;SIFT: NA;Polyphen-2: NA	Missense_Mutation	SNP	Diploid		.	.	.	23	108887283	108887283	A	G	23:g.108887283A>G	ENST00000340800.2:c.2111T>C	0.39		48	75		133	12220
Uterine Corpus Endometrial Carcinoma (TCGA, PanCancer Atlas)	TCGA-B5-A3FC-01		Uterine Endometrioid Carcinoma	R452Q	OncoKB: NA;CIViC: NA;MyCancerGenome: not present;CancerHotspot: no;3DHotspot: no	MutationAssessor: NA;SIFT: NA;Polyphen-2: NA	Missense_Mutation	SNP	Diploid		.	.	.	23	108911413	108911413	C	T	23:g.108911413C>T	ENST00000340800.2:c.1355G>A	0.41		18	26		74	12220
Uterine Corpus Endometrial Carcinoma (TCGA, PanCancer Atlas)	TCGA-BG-A222-01		Uterine Endometrioid Carcinoma	K116*	OncoKB: NA;CIViC: NA;MyCancerGenome: not present;CancerHotspot: no;3DHotspot: no	MutationAssessor: NA;SIFT: NA;Polyphen-2: NA	Frame_Shift_Ins	INS			.	.	.	23	108926370	108926371	-	A	23:g.108926370_108926371insA	ENST00000340800.2:c.345dup	0.2		6	24		21
Uterine Corpus Endometrial Carcinoma (TCGA, PanCancer Atlas)	TCGA-BS-A0UV-01		Uterine Endometrioid Carcinoma	R380I	OncoKB: NA;CIViC: NA;MyCancerGenome: not present;CancerHotspot: no;3DHotspot: no	MutationAssessor: NA;SIFT: NA;Polyphen-2: NA	Missense_Mutation	SNP			.	.	.	23	108912389	108912389	C	A	23:g.108912389C>A	ENST00000340800.2:c.1139G>T	0.1		13	116		209
Uterine Corpus Endometrial Carcinoma (TCGA, PanCancer Atlas)	TCGA-E6-A1LX-01		Uterine Endometrioid Carcinoma	R380I	OncoKB: NA;CIViC: NA;MyCancerGenome: not present;CancerHotspot: no;3DHotspot: no	MutationAssessor: NA;SIFT: NA;Polyphen-2: NA	Missense_Mutation	SNP	Diploid		.	.	.	23	108912389	108912389	C	A	23:g.108912389C>A	ENST00000340800.2:c.1139G>T	0.24		9	29		45	12704
Uterine Corpus Endometrial Carcinoma (TCGA, PanCancer Atlas)	TCGA-EO-A22R-01		Uterine Endometrioid Carcinoma	T485A	OncoKB: NA;CIViC: NA;MyCancerGenome: not present;CancerHotspot: no;3DHotspot: no	MutationAssessor: NA;SIFT: NA;Polyphen-2: NA	Missense_Mutation	SNP			.	.	.	23	108908709	108908709	T	C	23:g.108908709T>C	ENST00000340800.2:c.1453A>G	0.41		12	17		45
Uterine Corpus Endometrial Carcinoma (TCGA, PanCancer Atlas)	TCGA-EO-A22R-01		Uterine Endometrioid Carcinoma	V385G	OncoKB: NA;CIViC: NA;MyCancerGenome: not present;CancerHotspot: no;3DHotspot: no	MutationAssessor: NA;SIFT: NA;Polyphen-2: NA	Missense_Mutation	SNP			.	.	.	23	108912374	108912374	A	C	23:g.108912374A>C	ENST00000340800.2:c.1154T>G	0.36		20	35		38
Uterine Corpus Endometrial Carcinoma (TCGA, PanCancer Atlas)	TCGA-EO-A22R-01		Uterine Endometrioid Carcinoma	G358*	OncoKB: NA;CIViC: NA;MyCancerGenome: not present;CancerHotspot: no;3DHotspot: no	MutationAssessor: NA;SIFT: NA;Polyphen-2: NA	Nonsense_Mutation	SNP			.	.	.	23	108917684	108917684	C	A	23:g.108917684C>A	ENST00000340800.2:c.1072G>T	0.33		22	44		63
Uterine Corpus Endometrial Carcinoma (TCGA, PanCancer Atlas)	TCGA-EO-A22U-01		Uterine Endometrioid Carcinoma	G710D	OncoKB: NA;CIViC: NA;MyCancerGenome: not present;CancerHotspot: no;3DHotspot: no	MutationAssessor: NA;SIFT: NA;Polyphen-2: NA	Missense_Mutation	SNP			.	.	.	23	108887265	108887265	C	T	23:g.108887265C>T	ENST00000340800.2:c.2129G>A	0.33		39	81		54
Uterine Corpus Endometrial Carcinoma (TCGA, PanCancer Atlas)	TCGA-EO-A22U-01		Uterine Endometrioid Carcinoma	S607Kfs*2	OncoKB: NA;CIViC: NA;MyCancerGenome: not present;CancerHotspot: no;3DHotspot: no	MutationAssessor: NA;SIFT: NA;Polyphen-2: NA	Frame_Shift_Ins	INS			.	.	.	23	108904760	108904761	-	T	23:g.108904760_108904761insT	ENST00000340800.2:c.1819dup	0.3		18	43		27
Uterine Corpus Endometrial Carcinoma (TCGA, PanCancer Atlas)	TCGA-EO-A22U-01		Uterine Endometrioid Carcinoma	Q410H	OncoKB: NA;CIViC: NA;MyCancerGenome: not present;CancerHotspot: no;3DHotspot: no	MutationAssessor: NA;SIFT: NA;Polyphen-2: NA	Missense_Mutation	SNP			.	.	.	23	108912298	108912298	C	A	23:g.108912298C>A	ENST00000340800.2:c.1230G>T	0.44		19	24		24
Uterine Corpus Endometrial Carcinoma (TCGA, PanCancer Atlas)	TCGA-EO-A22U-01		Uterine Endometrioid Carcinoma	E304D	OncoKB: NA;CIViC: NA;MyCancerGenome: not present;CancerHotspot: no;3DHotspot: no	MutationAssessor: NA;SIFT: NA;Polyphen-2: NA	Missense_Mutation	SNP			.	.	.	23	108921511	108921511	T	G	23:g.108921511T>G	ENST00000340800.2:c.912A>C	0.36		23	41		34
Uterine Corpus Endometrial Carcinoma (TCGA, PanCancer Atlas)	TCGA-EO-A22U-01		Uterine Endometrioid Carcinoma	F156V	OncoKB: NA;CIViC: NA;MyCancerGenome: not present;CancerHotspot: no;3DHotspot: no	MutationAssessor: NA;SIFT: NA;Polyphen-2: NA	Missense_Mutation	SNP			.	.	.	23	108926011	108926011	A	C	23:g.108926011A>C	ENST00000340800.2:c.466T>G	0.28		20	52		45
Uterine Corpus Endometrial Carcinoma (TCGA, PanCancer Atlas)	TCGA-EO-A22X-01		Uterine Endometrioid Carcinoma	A188S	OncoKB: NA;CIViC: NA;MyCancerGenome: not present;CancerHotspot: no;3DHotspot: no	MutationAssessor: NA;SIFT: NA;Polyphen-2: NA	Missense_Mutation	SNP			.	.	.	23	108924572	108924572	C	A	23:g.108924572C>A	ENST00000340800.2:c.562G>T	0.34		13	25		60
Uterine Corpus Endometrial Carcinoma (TCGA, PanCancer Atlas)	TCGA-EO-A3B0-01		Uterine Endometrioid Carcinoma	R672Q	OncoKB: NA;CIViC: NA;MyCancerGenome: not present;CancerHotspot: no;3DHotspot: no	MutationAssessor: NA;SIFT: NA;Polyphen-2: NA	Missense_Mutation	SNP			.	.	.	23	108887379	108887379	C	T	23:g.108887379C>T	ENST00000340800.2:c.2015G>A	0.44		32	40		55				Uncertain_significance
Uterine Corpus Endometrial Carcinoma (TCGA, PanCancer Atlas)	TCGA-EY-A548-01		Uterine Endometrioid Carcinoma	P445Rfs*10	OncoKB: NA;CIViC: NA;MyCancerGenome: not present;CancerHotspot: no;3DHotspot: no	MutationAssessor: NA;SIFT: NA;Polyphen-2: NA	Frame_Shift_Del	DEL			.	.	.	23	108911434	108911434	G	-	23:g.108911434del	ENST00000340800.2:c.1334del	0.24		12	38		39
Uterine Corpus Endometrial Carcinoma (TCGA, PanCancer Atlas)	TCGA-FI-A2D0-01		Uterine Endometrioid Carcinoma	V685I	OncoKB: NA;CIViC: NA;MyCancerGenome: not present;CancerHotspot: no;3DHotspot: no	MutationAssessor: NA;SIFT: NA;Polyphen-2: NA	Missense_Mutation	SNP			.	.	.	23	108887341	108887341	C	T	23:g.108887341C>T	ENST00000340800.2:c.2053G>A	0.4		30	45		110
Uterine Corpus Endometrial Carcinoma (TCGA, PanCancer Atlas)	TCGA-FI-A2D0-01		Uterine Endometrioid Carcinoma	G358Rfs*23	OncoKB: NA;CIViC: NA;MyCancerGenome: not present;CancerHotspot: no;3DHotspot: no	MutationAssessor: NA;SIFT: NA;Polyphen-2: NA	Frame_Shift_Ins	INS			.	.	.	23	108917684	108917685	-	T	23:g.108917684_108917685insT	ENST00000340800.2:c.1071dup	0.18		8	37		56
Lung Adenocarcinoma (TCGA, PanCancer Atlas)	TCGA-99-8028-01		Lung Adenocarcinoma	D94G	OncoKB: NA;CIViC: NA;MyCancerGenome: not present;CancerHotspot: no;3DHotspot: no	MutationAssessor: NA;SIFT: NA;Polyphen-2: NA	Missense_Mutation	SNP		1	.	.	.	23	108926435	108926435	T	C	23:g.108926435T>C	ENST00000340800.2:c.281A>G	0.07		13	174		112
Lung Adenocarcinoma (TCGA, PanCancer Atlas)	TCGA-49-6767-01		Lung Adenocarcinoma	Q464H	OncoKB: NA;CIViC: NA;MyCancerGenome: not present;CancerHotspot: no;3DHotspot: no	MutationAssessor: NA;SIFT: NA;Polyphen-2: NA	Missense_Mutation	SNP		1	.	.	.	23	108911376	108911376	C	A	23:g.108911376C>A	ENST00000340800.2:c.1392G>T	0.05	0.0075	6	122	1	132
Lung Adenocarcinoma (TCGA, PanCancer Atlas)	TCGA-55-6971-01		Lung Adenocarcinoma	L25P	OncoKB: NA;CIViC: NA;MyCancerGenome: not present;CancerHotspot: no;3DHotspot: no	MutationAssessor: NA;SIFT: NA;Polyphen-2: NA	Missense_Mutation	SNP		1	.	.	.	23	108926642	108926642	A	G	23:g.108926642A>G	ENST00000340800.2:c.74T>C	0.21	0.0073	29	109	1	136
Lung Adenocarcinoma (TCGA, PanCancer Atlas)	TCGA-55-8514-01		Lung Adenocarcinoma	D608Y	OncoKB: NA;CIViC: NA;MyCancerGenome: not present;CancerHotspot: no;3DHotspot: no	MutationAssessor: NA;SIFT: NA;Polyphen-2: NA	Missense_Mutation	SNP			.	.	.	23	108902739	108902739	C	A	23:g.108902739C>A	ENST00000340800.2:c.1822G>T	0.14		11	68		91
Lung Adenocarcinoma (TCGA, PanCancer Atlas)	TCGA-69-8253-01		Lung Adenocarcinoma	W636L	OncoKB: NA;CIViC: NA;MyCancerGenome: not present;CancerHotspot: no;3DHotspot: no	MutationAssessor: NA;SIFT: NA;Polyphen-2: NA	Missense_Mutation	SNP			.	.	.	23	108902654	108902654	C	A	23:g.108902654C>A	ENST00000340800.2:c.1907G>T	0.16		19	101		114
Lung Adenocarcinoma (TCGA, PanCancer Atlas)	TCGA-80-5608-01		Lung Adenocarcinoma	A590D	OncoKB: NA;CIViC: NA;MyCancerGenome: not present;CancerHotspot: no;3DHotspot: no	MutationAssessor: NA;SIFT: NA;Polyphen-2: NA	Missense_Mutation	SNP		1	.	.	.	23	108904811	108904811	G	T	23:g.108904811G>T	ENST00000340800.2:c.1769C>A	0.08		9	106		108
Lung Adenocarcinoma (TCGA, PanCancer Atlas)	TCGA-NJ-A4YQ-01		Lung Adenocarcinoma	E240*	OncoKB: NA;CIViC: NA;MyCancerGenome: not present;CancerHotspot: no;3DHotspot: no	MutationAssessor: NA;SIFT: NA;Polyphen-2: NA	Nonsense_Mutation	SNP			.	.	.	23	108924287	108924287	C	A	23:g.108924287C>A	ENST00000340800.2:c.718G>T	0.14		14	84		190
Esophageal Adenocarcinoma (TCGA, PanCancer Atlas)	TCGA-Z6-AAPN-01		Esophageal Squamous Cell Carcinoma	Q449E	OncoKB: NA;CIViC: NA;MyCancerGenome: not present;CancerHotspot: no;3DHotspot: no	MutationAssessor: NA;SIFT: NA;Polyphen-2: NA	Missense_Mutation	SNP			.	.	.	23	108911423	108911423	G	C	23:g.108911423G>C	ENST00000340800.2:c.1345C>G	0.46		19	22		26
Skin Cutaneous Melanoma (TCGA, PanCancer Atlas)	TCGA-GF-A6C9-06		Cutaneous Melanoma	R654*	OncoKB: NA;CIViC: NA;MyCancerGenome: not present;CancerHotspot: no;3DHotspot: no	MutationAssessor: NA;SIFT: NA;Polyphen-2: NA	Nonsense_Mutation	SNP		1	.	.	.	23	108902601	108902601	G	A	23:g.108902601G>A	ENST00000340800.2:c.1960C>T	0.14		11	69		69
Skin Cutaneous Melanoma (TCGA, PanCancer Atlas)	TCGA-FS-A1ZA-06		Cutaneous Melanoma	I649L	OncoKB: NA;CIViC: NA;MyCancerGenome: not present;CancerHotspot: no;3DHotspot: no	MutationAssessor: NA;SIFT: NA;Polyphen-2: NA	Missense_Mutation	SNP		1	.	.	.	23	108902616	108902616	T	A	23:g.108902616T>A	ENST00000340800.2:c.1945A>T	0.73		54	20		184
Skin Cutaneous Melanoma (TCGA, PanCancer Atlas)	TCGA-RP-A694-06		Cutaneous Melanoma	Y173N	OncoKB: NA;CIViC: NA;MyCancerGenome: not present;CancerHotspot: no;3DHotspot: no	MutationAssessor: NA;SIFT: NA;Polyphen-2: NA	Missense_Mutation	SNP			.	.	.	23	108925960	108925960	A	T	23:g.108925960A>T	ENST00000340800.2:c.517T>A	0.76		55	17		111
Skin Cutaneous Melanoma (TCGA, PanCancer Atlas)	TCGA-FR-A726-01		Cutaneous Melanoma	G434E	OncoKB: NA;CIViC: NA;MyCancerGenome: not present;CancerHotspot: no;3DHotspot: no	MutationAssessor: NA;SIFT: NA;Polyphen-2: NA	Missense_Mutation	SNP			.	.	.	23	108911467	108911467	C	T	23:g.108911467C>T	ENST00000340800.2:c.1301G>A	0.76		50	16		73
Skin Cutaneous Melanoma (TCGA, PanCancer Atlas)	TCGA-EE-A182-06		Cutaneous Melanoma	R60C	OncoKB: NA;CIViC: NA;MyCancerGenome: not present;CancerHotspot: no;3DHotspot: no	MutationAssessor: NA;SIFT: NA;Polyphen-2: NA	Missense_Mutation	SNP	Diploid	1	.	.	.	23	108926538	108926538	G	A	23:g.108926538G>A	ENST00000340800.2:c.178C>T	0.32		93	201		284	1219
Skin Cutaneous Melanoma (TCGA, PanCancer Atlas)	TCGA-D3-A1Q3-06		Cutaneous Melanoma	Q464H	OncoKB: NA;CIViC: NA;MyCancerGenome: not present;CancerHotspot: no;3DHotspot: no	MutationAssessor: NA;SIFT: NA;Polyphen-2: NA	Missense_Mutation	SNP		1	.	.	.	23	108911376	108911376	C	A	23:g.108911376C>A	ENST00000340800.2:c.1392G>T	0.1		5	44		32
Skin Cutaneous Melanoma (TCGA, PanCancer Atlas)	TCGA-GF-A4EO-06		Cutaneous Melanoma	R133C	OncoKB: NA;CIViC: NA;MyCancerGenome: not present;CancerHotspot: no;3DHotspot: no	MutationAssessor: NA;SIFT: NA;Polyphen-2: NA	Missense_Mutation	SNP		4	.	.	.	23	108926080	108926080	G	A	23:g.108926080G>A	ENST00000340800.2:c.397C>T	0.14		14	89		97
Skin Cutaneous Melanoma (TCGA, PanCancer Atlas)	TCGA-BF-A1PX-01		Cutaneous Melanoma	G361*	OncoKB: NA;CIViC: NA;MyCancerGenome: not present;CancerHotspot: no;3DHotspot: no	MutationAssessor: NA;SIFT: NA;Polyphen-2: NA	Nonsense_Mutation	SNP			.	.	.	23	108917675	108917675	C	A	23:g.108917675C>A	ENST00000340800.2:c.1081G>T	0.11		4	31		23
Skin Cutaneous Melanoma (TCGA, PanCancer Atlas)	TCGA-D3-A2JC-06		Cutaneous Melanoma	R134I	OncoKB: NA;CIViC: NA;MyCancerGenome: not present;CancerHotspot: no;3DHotspot: no	MutationAssessor: NA;SIFT: NA;Polyphen-2: NA	Missense_Mutation	SNP			.	.	.	23	108926076	108926076	C	A	23:g.108926076C>A	ENST00000340800.2:c.401G>T	0.08		3	33		42
Skin Cutaneous Melanoma (TCGA, PanCancer Atlas)	TCGA-FS-A1ZR-06		Cutaneous Melanoma	R134I	OncoKB: NA;CIViC: NA;MyCancerGenome: not present;CancerHotspot: no;3DHotspot: no	MutationAssessor: NA;SIFT: NA;Polyphen-2: NA	Missense_Mutation	SNP			.	.	.	23	108926076	108926076	C	A	23:g.108926076C>A	ENST00000340800.2:c.401G>T	0.08		3	35		54
Skin Cutaneous Melanoma (TCGA, PanCancer Atlas)	TCGA-DA-A1I1-06		Cutaneous Melanoma	P375=	OncoKB: NA;CIViC: NA;MyCancerGenome: not present;CancerHotspot: no;3DHotspot: no	MutationAssessor: NA;SIFT: NA;Polyphen-2: NA	Splice_Region	SNP			.	.	.	23	108917631	108917631	C	A	23:g.108917631C>A	ENST00000340800.2:c.1125G>T	0.1		4	35		11
Skin Cutaneous Melanoma (TCGA, PanCancer Atlas)	TCGA-DA-A95V-06		Cutaneous Melanoma	G254E	OncoKB: NA;CIViC: NA;MyCancerGenome: not present;CancerHotspot: no;3DHotspot: no	MutationAssessor: NA;SIFT: NA;Polyphen-2: NA	Missense_Mutation	SNP			.	.	.	23	108924244	108924244	C	T	23:g.108924244C>T	ENST00000340800.2:c.761G>A	0.13		21	135		184
Skin Cutaneous Melanoma (TCGA, PanCancer Atlas)	TCGA-EE-A29E-06		Cutaneous Melanoma	P448T	OncoKB: NA;CIViC: NA;MyCancerGenome: not present;CancerHotspot: no;3DHotspot: no	MutationAssessor: NA;SIFT: NA;Polyphen-2: NA	Missense_Mutation	SNP			.	.	.	23	108911426	108911426	G	T	23:g.108911426G>T	ENST00000340800.2:c.1342C>A	0.09		4	41		68
Skin Cutaneous Melanoma (TCGA, PanCancer Atlas)	TCGA-EE-A29E-06		Cutaneous Melanoma	P239H	OncoKB: NA;CIViC: NA;MyCancerGenome: not present;CancerHotspot: no;3DHotspot: no	MutationAssessor: NA;SIFT: NA;Polyphen-2: NA	Missense_Mutation	SNP		3	.	.	.	23	108924289	108924289	G	T	23:g.108924289G>T	ENST00000340800.2:c.716C>A	0.12		5	38		60
Skin Cutaneous Melanoma (TCGA, PanCancer Atlas)	TCGA-EE-A2MG-06		Cutaneous Melanoma	G434W	OncoKB: NA;CIViC: NA;MyCancerGenome: not present;CancerHotspot: no;3DHotspot: no	MutationAssessor: NA;SIFT: NA;Polyphen-2: NA	Missense_Mutation	SNP			.	.	.	23	108911468	108911468	C	A	23:g.108911468C>A	ENST00000340800.2:c.1300G>T	0.13		5	33		41
Skin Cutaneous Melanoma (TCGA, PanCancer Atlas)	TCGA-W3-AA1W-06		Cutaneous Melanoma	A659=	OncoKB: NA;CIViC: NA;MyCancerGenome: not present;CancerHotspot: no;3DHotspot: no	MutationAssessor: NA;SIFT: NA;Polyphen-2: NA	Splice_Region	SNP			.	.	.	23	108902584	108902584	G	A	23:g.108902584G>A	ENST00000340800.2:c.1977C>T	0.41		24	35		53
Skin Cutaneous Melanoma (TCGA, PanCancer Atlas)	TCGA-Z2-A8RT-06		Cutaneous Melanoma	G112E	OncoKB: NA;CIViC: NA;MyCancerGenome: not present;CancerHotspot: no;3DHotspot: no	MutationAssessor: NA;SIFT: NA;Polyphen-2: NA	Missense_Mutation	SNP			.	.	.	23	108926381	108926381	C	T	23:g.108926381C>T	ENST00000340800.2:c.335G>A	0.36		37	65		96
Stomach Adenocarcinoma (TCGA, PanCancer Atlas)	TCGA-BR-4184-01		Stomach Adenocarcinoma	R664Q	OncoKB: NA;CIViC: NA;MyCancerGenome: not present;CancerHotspot: no;3DHotspot: no	MutationAssessor: NA;SIFT: NA;Polyphen-2: NA	Missense_Mutation	SNP		1	.	.	.	23	108887403	108887403	C	T	23:g.108887403C>T	ENST00000340800.2:c.1991G>A	0.57		12	9		27
Stomach Adenocarcinoma (TCGA, PanCancer Atlas)	TCGA-BR-6452-01		Stomach Adenocarcinoma	N259=	OncoKB: NA;CIViC: NA;MyCancerGenome: not present;CancerHotspot: no;3DHotspot: no	MutationAssessor: NA;SIFT: NA;Polyphen-2: NA	Splice_Region	SNP			.	.	.	23	108924228	108924228	G	A	23:g.108924228G>A	ENST00000340800.2:c.777C>T	0.06		9	145		186
Stomach Adenocarcinoma (TCGA, PanCancer Atlas)	TCGA-BR-8687-01		Stomach Adenocarcinoma	S674G	OncoKB: NA;CIViC: NA;MyCancerGenome: not present;CancerHotspot: no;3DHotspot: no	MutationAssessor: NA;SIFT: NA;Polyphen-2: NA	Missense_Mutation	SNP		1	.	.	.	23	108887374	108887374	T	C	23:g.108887374T>C	ENST00000340800.2:c.2020A>G	0.2		21	84		96
Stomach Adenocarcinoma (TCGA, PanCancer Atlas)	TCGA-CD-8527-01		Intestinal Type Stomach Adenocarcinoma	G473S	OncoKB: NA;CIViC: NA;MyCancerGenome: not present;CancerHotspot: no;3DHotspot: no	MutationAssessor: NA;SIFT: NA;Polyphen-2: NA	Missense_Mutation	SNP		1	.	.	.	23	108911351	108911351	C	T	23:g.108911351C>T	ENST00000340800.2:c.1417G>A	0.51		38	37		219
Stomach Adenocarcinoma (TCGA, PanCancer Atlas)	TCGA-HU-A4H3-01		Diffuse Type Stomach Adenocarcinoma	L623S	OncoKB: NA;CIViC: NA;MyCancerGenome: not present;CancerHotspot: no;3DHotspot: no	MutationAssessor: NA;SIFT: NA;Polyphen-2: NA	Missense_Mutation	SNP		1	.	.	.	23	108902693	108902693	A	G	23:g.108902693A>G	ENST00000340800.2:c.1868T>C	0.22		21	74		149
Stomach Adenocarcinoma (TCGA, PanCancer Atlas)	TCGA-VQ-A924-01		Tubular Stomach Adenocarcinoma	H699N	OncoKB: NA;CIViC: NA;MyCancerGenome: not present;CancerHotspot: no;3DHotspot: no	MutationAssessor: NA;SIFT: NA;Polyphen-2: NA	Missense_Mutation	SNP			.	.	.	23	108887299	108887299	G	T	23:g.108887299G>T	ENST00000340800.2:c.2095C>A	0.51		26	25		54
Breast Invasive Carcinoma (TCGA, PanCancer Atlas)	TCGA-D8-A27G-01		Breast Invasive Lobular Carcinoma	S249L	OncoKB: NA;CIViC: NA;MyCancerGenome: not present;CancerHotspot: no;3DHotspot: no	MutationAssessor: NA;SIFT: NA;Polyphen-2: NA	Missense_Mutation	SNP		2	.	.	.	23	108924259	108924259	G	A	23:g.108924259G>A	ENST00000340800.2:c.746C>T	0.33		26	53		108
Breast Invasive Carcinoma (TCGA, PanCancer Atlas)	TCGA-A1-A0SH-01		Breast Invasive Ductal Carcinoma	G443E	OncoKB: NA;CIViC: NA;MyCancerGenome: not present;CancerHotspot: no;3DHotspot: no	MutationAssessor: NA;SIFT: NA;Polyphen-2: NA	Missense_Mutation	SNP		1	.	.	.	23	108911440	108911440	C	T	23:g.108911440C>T	ENST00000340800.2:c.1328G>A	0.24		27	84		99
Breast Invasive Carcinoma (TCGA, PanCancer Atlas)	TCGA-AC-A23H-01		Breast Invasive Ductal Carcinoma	E105Q	OncoKB: NA;CIViC: NA;MyCancerGenome: not present;CancerHotspot: no;3DHotspot: no	MutationAssessor: NA;SIFT: NA;Polyphen-2: NA	Missense_Mutation	SNP		1	.	.	.	23	108926403	108926403	C	G	23:g.108926403C>G	ENST00000340800.2:c.313G>C	0.21		31	114		137
Breast Invasive Carcinoma (TCGA, PanCancer Atlas)	TCGA-B6-A0RG-01		Breast Invasive Ductal Carcinoma	T278S	OncoKB: NA;CIViC: NA;MyCancerGenome: not present;CancerHotspot: no;3DHotspot: no	MutationAssessor: NA;SIFT: NA;Polyphen-2: NA	Missense_Mutation	SNP		1	.	.	.	23	108921590	108921590	G	C	23:g.108921590G>C	ENST00000340800.2:c.833C>G	0.35		58	108		210
Breast Invasive Carcinoma (TCGA, PanCancer Atlas)	TCGA-AN-A046-01		Breast Invasive Ductal Carcinoma	K2E	OncoKB: NA;CIViC: NA;MyCancerGenome: not present;CancerHotspot: no;3DHotspot: no	MutationAssessor: NA;SIFT: NA;Polyphen-2: NA	Missense_Mutation	SNP		1	.	.	.	23	108926712	108926712	T	C	23:g.108926712T>C	ENST00000340800.2:c.4A>G	0.24		27	85		110
Breast Invasive Carcinoma (TCGA, PanCancer Atlas)	TCGA-AR-A255-01		Breast Invasive Ductal Carcinoma	I669M	OncoKB: NA;CIViC: NA;MyCancerGenome: not present;CancerHotspot: no;3DHotspot: no	MutationAssessor: NA;SIFT: NA;Polyphen-2: NA	Missense_Mutation	SNP			.	.	.	23	108887387	108887387	G	C	23:g.108887387G>C	ENST00000340800.2:c.2007C>G	0.08		4	46		89
Breast Invasive Carcinoma (TCGA, PanCancer Atlas)	TCGA-AR-A5QQ-01		Breast Invasive Carcinoma (NOS)	R45K	OncoKB: NA;CIViC: NA;MyCancerGenome: not present;CancerHotspot: no;3DHotspot: no	MutationAssessor: NA;SIFT: NA;Polyphen-2: NA	Missense_Mutation	SNP		1	.	.	.	23	108926582	108926582	C	T	23:g.108926582C>T	ENST00000340800.2:c.134G>A	0.08		4	47		55
Pancreatic Adenocarcinoma (TCGA, PanCancer Atlas)	TCGA-FB-AAPS-01		Pancreatic Adenocarcinoma	G241E	OncoKB: NA;CIViC: NA;MyCancerGenome: not present;CancerHotspot: no;3DHotspot: no	MutationAssessor: NA;SIFT: NA;Polyphen-2: NA	Missense_Mutation	SNP			.	.	.	23	108924283	108924283	C	T	23:g.108924283C>T	ENST00000340800.2:c.722G>A	0.1		53	469		103
Pancreatic Adenocarcinoma (TCGA, PanCancer Atlas)	TCGA-FB-AAPU-01		Pancreatic Adenocarcinoma	D271E	OncoKB: NA;CIViC: NA;MyCancerGenome: not present;CancerHotspot: no;3DHotspot: no	MutationAssessor: NA;SIFT: NA;Polyphen-2: NA	Missense_Mutation	SNP			.	.	.	23	108921610	108921610	G	T	23:g.108921610G>T	ENST00000340800.2:c.813C>A	0.14		64	383		128
Colorectal Adenocarcinoma (TCGA, PanCancer Atlas)	TCGA-F5-6814-01		Rectal Adenocarcinoma	N111H	OncoKB: NA;CIViC: NA;MyCancerGenome: not present;CancerHotspot: no;3DHotspot: no	MutationAssessor: NA;SIFT: NA;Polyphen-2: NA	Missense_Mutation	SNP		1	.	.	.	23	108926385	108926385	T	G	23:g.108926385T>G	ENST00000340800.2:c.331A>C	0.76		31	10		69
Colorectal Adenocarcinoma (TCGA, PanCancer Atlas)	TCGA-AA-3819-01		Colon Adenocarcinoma	A627T	OncoKB: NA;CIViC: NA;MyCancerGenome: not present;CancerHotspot: no;3DHotspot: no	MutationAssessor: NA;SIFT: NA;Polyphen-2: NA	Missense_Mutation	SNP		1	.	.	.	23	108902682	108902682	C	T	23:g.108902682C>T	ENST00000340800.2:c.1879G>A	0.28		95	243		316
Colorectal Adenocarcinoma (TCGA, PanCancer Atlas)	TCGA-AA-3856-01		Colon Adenocarcinoma	G505=	OncoKB: NA;CIViC: NA;MyCancerGenome: not present;CancerHotspot: no;3DHotspot: no	MutationAssessor: NA;SIFT: NA;Polyphen-2: NA	Splice_Region	SNP			.	.	.	23	108906630	108906630	G	A	23:g.108906630G>A	ENST00000340800.2:c.1515C>T	0.42		109	153		318
Colorectal Adenocarcinoma (TCGA, PanCancer Atlas)	TCGA-CK-4951-01		Mucinous Adenocarcinoma of the Colon and Rectum	G505=	OncoKB: NA;CIViC: NA;MyCancerGenome: not present;CancerHotspot: no;3DHotspot: no	MutationAssessor: NA;SIFT: NA;Polyphen-2: NA	Splice_Region	SNP			.	.	.	23	108906630	108906630	G	A	23:g.108906630G>A	ENST00000340800.2:c.1515C>T	0.23	0.0048	43	147	1	209
Colorectal Adenocarcinoma (TCGA, PanCancer Atlas)	TCGA-NH-A5IV-01		Colon Adenocarcinoma	G505=	OncoKB: NA;CIViC: NA;MyCancerGenome: not present;CancerHotspot: no;3DHotspot: no	MutationAssessor: NA;SIFT: NA;Polyphen-2: NA	Splice_Region	SNP			.	.	.	23	108906630	108906630	G	A	23:g.108906630G>A	ENST00000340800.2:c.1515C>T	0.4		125	186		283
Colorectal Adenocarcinoma (TCGA, PanCancer Atlas)	TCGA-AA-3977-01		Colon Adenocarcinoma	R654*	OncoKB: NA;CIViC: NA;MyCancerGenome: not present;CancerHotspot: no;3DHotspot: no	MutationAssessor: NA;SIFT: NA;Polyphen-2: NA	Nonsense_Mutation	SNP		1	.	.	.	23	108902601	108902601	G	A	23:g.108902601G>A	ENST00000340800.2:c.1960C>T	0.24		22	68		37
Colorectal Adenocarcinoma (TCGA, PanCancer Atlas)	TCGA-AA-3984-01		Colon Adenocarcinoma	W30*	OncoKB: NA;CIViC: NA;MyCancerGenome: not present;CancerHotspot: no;3DHotspot: no	MutationAssessor: NA;SIFT: NA;Polyphen-2: NA	Nonsense_Mutation	SNP		1	.	.	.	23	108926626	108926626	C	T	23:g.108926626C>T	ENST00000340800.2:c.90G>A	0.2		97	380		412
Colorectal Adenocarcinoma (TCGA, PanCancer Atlas)	TCGA-AZ-4315-01		Colon Adenocarcinoma	N525T	OncoKB: NA;CIViC: NA;MyCancerGenome: not present;CancerHotspot: no;3DHotspot: no	MutationAssessor: NA;SIFT: NA;Polyphen-2: NA	Missense_Mutation	SNP		1	.	.	.	23	108906571	108906571	T	G	23:g.108906571T>G	ENST00000340800.2:c.1574A>C	0.68		82	38		221
Colorectal Adenocarcinoma (TCGA, PanCancer Atlas)	TCGA-CA-6717-01		Mucinous Adenocarcinoma of the Colon and Rectum	K593E	OncoKB: NA;CIViC: NA;MyCancerGenome: not present;CancerHotspot: no;3DHotspot: no	MutationAssessor: NA;SIFT: NA;Polyphen-2: NA	Missense_Mutation	SNP		1	.	.	.	23	108904803	108904803	T	C	23:g.108904803T>C	ENST00000340800.2:c.1777A>G	0.16		29	152		138
Colorectal Adenocarcinoma (TCGA, PanCancer Atlas)	TCGA-CK-6751-01		Mucinous Adenocarcinoma of the Colon and Rectum	R284L	OncoKB: NA;CIViC: NA;MyCancerGenome: not present;CancerHotspot: no;3DHotspot: no	MutationAssessor: NA;SIFT: NA;Polyphen-2: NA	Missense_Mutation	SNP		1	.	.	.	23	108921572	108921572	C	A	23:g.108921572C>A	ENST00000340800.2:c.851G>T	0.3		39	91		184
Kidney Renal Papillary Cell Carcinoma (TCGA, PanCancer Atlas)	TCGA-G7-6797-01		Papillary Renal Cell Carcinoma	G112*	OncoKB: NA;CIViC: NA;MyCancerGenome: not present;CancerHotspot: no;3DHotspot: no	MutationAssessor: NA;SIFT: NA;Polyphen-2: NA	Nonsense_Mutation	SNP			.	.	.	23	108926382	108926382	C	A	23:g.108926382C>A	ENST00000340800.2:c.334G>T	0.09		5	49		59
Head and Neck Squamous Cell Carcinoma (TCGA, PanCancer Atlas)	TCGA-CR-7388-01		Head and Neck Squamous Cell Carcinoma	P345L	OncoKB: NA;CIViC: NA;MyCancerGenome: not present;CancerHotspot: no;3DHotspot: no	MutationAssessor: NA;SIFT: NA;Polyphen-2: NA	Missense_Mutation	SNP			.	.	.	23	108921236	108921236	G	A	23:g.108921236G>A	ENST00000340800.2:c.1034C>T	0.08		6	69		117
Head and Neck Squamous Cell Carcinoma (TCGA, PanCancer Atlas)	TCGA-CV-7440-01		Head and Neck Squamous Cell Carcinoma	I601V	OncoKB: NA;CIViC: NA;MyCancerGenome: not present;CancerHotspot: no;3DHotspot: no	MutationAssessor: NA;SIFT: NA;Polyphen-2: NA	Missense_Mutation	SNP			.	.	.	23	108904779	108904779	T	C	23:g.108904779T>C	ENST00000340800.2:c.1801A>G	0.51		23	22		50
Head and Neck Squamous Cell Carcinoma (TCGA, PanCancer Atlas)	TCGA-CV-6954-01		Head and Neck Squamous Cell Carcinoma	E646D	OncoKB: NA;CIViC: NA;MyCancerGenome: not present;CancerHotspot: no;3DHotspot: no	MutationAssessor: NA;SIFT: NA;Polyphen-2: NA	Missense_Mutation	SNP			.	.	.	23	108902623	108902623	T	A	23:g.108902623T>A	ENST00000340800.2:c.1938A>T	0.55		32	26		95
Head and Neck Squamous Cell Carcinoma (TCGA, PanCancer Atlas)	TCGA-CV-6942-01		Head and Neck Squamous Cell Carcinoma	S88T	OncoKB: NA;CIViC: NA;MyCancerGenome: not present;CancerHotspot: no;3DHotspot: no	MutationAssessor: NA;SIFT: NA;Polyphen-2: NA	Missense_Mutation	SNP			.	.	.	23	108926454	108926454	A	T	23:g.108926454A>T	ENST00000340800.2:c.262T>A	0.21		37	143		133
Head and Neck Squamous Cell Carcinoma (TCGA, PanCancer Atlas)	TCGA-CX-7086-01		Head and Neck Squamous Cell Carcinoma	F400L	OncoKB: NA;CIViC: NA;MyCancerGenome: not present;CancerHotspot: no;3DHotspot: no	MutationAssessor: NA;SIFT: NA;Polyphen-2: NA	Missense_Mutation	SNP			.	.	.	23	108912328	108912328	G	C	23:g.108912328G>C	ENST00000340800.2:c.1200C>G	0.28		13	34		42
Head and Neck Squamous Cell Carcinoma (TCGA, PanCancer Atlas)	TCGA-CV-A45U-01		Head and Neck Squamous Cell Carcinoma	X375_splice	OncoKB: NA;CIViC: NA;MyCancerGenome: not present;CancerHotspot: no;3DHotspot: no	MutationAssessor: NA;SIFT: NA;Polyphen-2: NA	Splice_Region	SNP			.	.	.	23	108917628	108917628	C	T	23:g.108917628C>T	ENST00000340800.2:c.1125+3G>A	0.38		9	15		13
Cervical Squamous Cell Carcinoma (TCGA, PanCancer Atlas)	TCGA-2W-A8YY-01		Cervical Squamous Cell Carcinoma	A430V	OncoKB: NA;CIViC: NA;MyCancerGenome: not present;CancerHotspot: no;3DHotspot: no	MutationAssessor: NA;SIFT: NA;Polyphen-2: NA	Missense_Mutation	SNP			.	.	.	23	108911479	108911479	G	A	23:g.108911479G>A	ENST00000340800.2:c.1289C>T	0.36		17	30		52
Cervical Squamous Cell Carcinoma (TCGA, PanCancer Atlas)	TCGA-Q1-A73O-01		Cervical Squamous Cell Carcinoma	R672G	OncoKB: NA;CIViC: NA;MyCancerGenome: not present;CancerHotspot: no;3DHotspot: no	MutationAssessor: NA;SIFT: NA;Polyphen-2: NA	Missense_Mutation	SNP			.	.	.	23	108887380	108887380	G	C	23:g.108887380G>C	ENST00000340800.2:c.2014C>G	0.17		11	53		55
Cervical Squamous Cell Carcinoma (TCGA, PanCancer Atlas)	TCGA-FU-A3HZ-01		Cervical Squamous Cell Carcinoma	K593N	OncoKB: NA;CIViC: NA;MyCancerGenome: not present;CancerHotspot: no;3DHotspot: no	MutationAssessor: NA;SIFT: NA;Polyphen-2: NA	Missense_Mutation	SNP		1	.	.	.	23	108904801	108904801	C	A	23:g.108904801C>A	ENST00000340800.2:c.1779G>T	0.5		14	14		23
Cervical Squamous Cell Carcinoma (TCGA, PanCancer Atlas)	TCGA-EA-A3HU-01		Cervical Squamous Cell Carcinoma	G442*	OncoKB: NA;CIViC: NA;MyCancerGenome: not present;CancerHotspot: no;3DHotspot: no	MutationAssessor: NA;SIFT: NA;Polyphen-2: NA	Nonsense_Mutation	SNP			.	.	.	23	108911444	108911444	C	A	23:g.108911444C>A	ENST00000340800.2:c.1324G>T	0.13		7	45		44
Cervical Squamous Cell Carcinoma (TCGA, PanCancer Atlas)	TCGA-WL-A834-01		Cervical Squamous Cell Carcinoma	E243Q	OncoKB: NA;CIViC: NA;MyCancerGenome: not present;CancerHotspot: no;3DHotspot: no	MutationAssessor: NA;SIFT: NA;Polyphen-2: NA	Missense_Mutation	SNP			.	.	.	23	108924278	108924278	C	G	23:g.108924278C>G	ENST00000340800.2:c.727G>C	0.34		18	35		61
Cervical Squamous Cell Carcinoma (TCGA, PanCancer Atlas)	TCGA-2W-A8YY-01		Cervical Squamous Cell Carcinoma	E633D	OncoKB: NA;CIViC: NA;MyCancerGenome: not present;CancerHotspot: no;3DHotspot: no	MutationAssessor: NA;SIFT: NA;Polyphen-2: NA	Missense_Mutation	SNP			.	.	.	23	108902662	108902662	T	G	23:g.108902662T>G	ENST00000340800.2:c.1899A>C	0.27		26	70		93
Cervical Squamous Cell Carcinoma (TCGA, PanCancer Atlas)	TCGA-C5-A8XH-01		Cervical Squamous Cell Carcinoma	I225M	OncoKB: NA;CIViC: NA;MyCancerGenome: not present;CancerHotspot: no;3DHotspot: no	MutationAssessor: NA;SIFT: NA;Polyphen-2: NA	Missense_Mutation	SNP			.	.	.	23	108924330	108924330	G	C	23:g.108924330G>C	ENST00000340800.2:c.675C>G	0.23		9	30		68
Mesothelioma (TCGA, PanCancer Atlas)	TCGA-TS-A7P6-01		Pleural Mesothelioma, Epithelioid Type	M438V	OncoKB: NA;CIViC: NA;MyCancerGenome: not present;CancerHotspot: no;3DHotspot: no	MutationAssessor: NA;SIFT: NA;Polyphen-2: NA	Missense_Mutation	SNP			.	.	.	23	108911456	108911456	T	C	23:g.108911456T>C	ENST00000340800.2:c.1312A>G	0.52		12	11		23
[truncated: 76 more columns]

## Sheet: cBioPortal-survival
Correlation between ACSL4 altered and prognosis of various types of cancer
Survival Type	Number of Patients	# in Altered group	# in Unaltered group	Median months survival in Altered group (95% CI)	Median months survival in Unaltered group (95% CI)	p-Value	q-Value
Progression Free	10615	172	10443	95.60 (84.49 - NA)	60.46 (55.59 - 65.85)	0.005061	0.0202
Disease Free	5383	95	5288	NA	NA	0.0278	0.0405
Overall	10805	172	10633	106.88 (84.49 - NA)	78.44 (72.92 - 83.24)	0.0304	0.0405
Disease-specific	10260	167	10093	NA	133.74 (117.93 - 152.81)	0.138	0.138

## Sheet: GSCA  database-SNV
SNV percentage heatmap of ACSL4 in different cancers
cancertype	symbol	EffectiveMut	NonEffectiveMut	sample_size	percentage	entrez
BLCA	ACSL4	2	3	411	0.486618	2182
BRCA	ACSL4	7	7	1026	0.682261	2182
CESC	ACSL4	6	9	291	2.06186	2182
COAD	ACSL4	6	10	407	1.4742	2182
ESCA	ACSL4	1	0	185	0.540541	2182
GBM	ACSL4	3	2	403	0.744417	2182
HNSC	ACSL4	6	1	509	1.17878	2182
KIRC	ACSL4	0	1	370	0	2182
KIRP	ACSL4	1	0	282	0.35461	2182
LGG	ACSL4	4	1	526	0.760456	2182
LIHC	ACSL4	0	2	365	0	2182
LUAD	ACSL4	7	1	567	1.23457	2182
LUSC	ACSL4	1	1	485	0.206186	2182
MESO	ACSL4	1	0	82	1.21951	2182
OV	ACSL4	1	1	412	0.242718	2182
PAAD	ACSL4	2	0	178	1.1236	2182
READ	ACSL4	1	1	149	0.671141	2182
SARC	ACSL4	4	1	239	1.67364	2182
SKCM	ACSL4	14	8	468	2.99145	2182
STAD	ACSL4	6	3	439	1.36674	2182
UCEC	ACSL4	37	47	531	6.96798	2182
UCS	ACSL4	1	1	57	1.75439	2182

## Sheet: GACA database-CNV
Correlation of CNV with mRNA expression in different cancers
cancertype	symbol	spm	fdr	entrez
ACC	ACSL4	0.0192419	0.908374	2182
BLCA	ACSL4	0.133325	0.0117955	2182
BRCA	ACSL4	0.0731078	0.0216468	2182
CESC	ACSL4	0.0157266	0.831864	2182
CHOL	ACSL4	0.232606	0.328364	2182
COAD	ACSL4	0.107285	0.111085	2182
DLBC	ACSL4	0.174994	0.547893	2182
ESCA	ACSL4	0.183463	0.0213825	2182
GBM	ACSL4	0.0997925	0.334269	2182
HNSC	ACSL4	0.170649	0.000186123	2182
KICH	ACSL4	-0.128369	0.456632	2182
KIRC	ACSL4	-0.0171314	0.762712	2182
KIRP	ACSL4	-0.229536	0.000263387	2182
LAML	ACSL4	-0.0630734	0.753356	2182
LGG	ACSL4	-0.0243845	0.66393	2182
LIHC	ACSL4	0.0358034	0.575955	2182
LUAD	ACSL4	0.107239	0.021783	2182
LUSC	ACSL4	0.191029	2.999e-05	2182
MESO	ACSL4	0.120726	0.390922	2182
OV	ACSL4	0.0647567	0.297543	2182
PAAD	ACSL4	0.27326	0.000733897	2182
PCPG	ACSL4	0.00825395	0.951867	2182
PRAD	ACSL4	0.222662	4.076e-06	2182
READ	ACSL4	0.130075	0.31425	2182
SARC	ACSL4	0.312548	9.51963e-07	2182
SKCM	ACSL4	-0.0606001	0.309914	2182
STAD	ACSL4	0.131791	0.0121695	2182
TGCT	ACSL4	0.113852	0.240954	2182
THCA	ACSL4	-8.1849e-05	0.999553	2182
THYM	ACSL4	0.143731	0.265431	2182
UCEC	ACSL4	0.0408221	0.671414	2182
UCS	ACSL4	0.0454219	0.807985	2182
UVM	ACSL4	-0.202075	0.200518	2182
